# Supplementary material for: Genome-Wide Identification and Expression Analysis of NCED Gene Family in Pear and Its Response to Exogenous Gibberellin and Paclobutrazol
Source: MDPI journal article supplement (doi:10.3390/ijms24087566), 2023-04-20
Supplement: s1 [file s1]

**Table S1 Information of Physicochemical properties of NCED gene family members**

| Gene name       | Gene ID        | Scaff          | Scaff rename | Deduced protein |        |      |
|-----------------|----------------|----------------|--------------|-----------------|--------|------|
|                 |                |                |              | Size of aa      | MW(kD) | pI   |
| <i>PbNCED1</i>  | XM_009356579.2 | NW_008988076.1 | Scaff2       | 613             | 68.37  | 6.63 |
| <i>PbNCED2</i>  | XM_009362625.2 | NW_008988119.1 | Scaff3       | 603             | 66.64  | 6.45 |
| <i>PbNCED4</i>  | XM_009366657.2 | NW_008988157.1 | Scaff5       | 583             | 65.03  | 5.72 |
| <i>PbNCED5</i>  | XM_009366793.1 | NW_008988158.1 | Scaff6       | 474             | 53.92  | 5.88 |
| <i>PbNCED6</i>  | XM_009366794.2 | NW_008988158.1 | Scaff6       | 508             | 57.54  | 6.40 |
| <i>PbNCED7</i>  | XM_009367200.2 | NW_008988163.1 | Scaff7       | 601             | 66.04  | 7.31 |
| <i>PbNCED8</i>  | XM_009367201.2 | NW_008988163.1 | Scaff7       | 601             | 66.12  | 7.64 |
| <i>PbNCED9</i>  | XM_009369180.2 | NW_008988186.1 | Scaff8       | 563             | 62.21  | 6.68 |
| <i>PbNCED10</i> | XM_009369225.2 | NW_008988186.1 | Scaff8       | 615             | 69.13  | 5.61 |
| <i>PbNCED11</i> | XM_009369487.2 | NW_008988189.1 | Scaff9       | 617             | 68.67  | 6.65 |
| <i>PbNCED12</i> | XM_009369488.2 | NW_008988189.1 | Scaff9       | 617             | 68.67  | 6.65 |
| <i>PbNCED13</i> | XM_009369742.2 | NW_008988191.1 | Scaff10      | 615             | 69.13  | 5.61 |
| <i>PbNCED14</i> | XM_009374927.1 | NW_008988263.1 | Scaff11      | 616             | 68.38  | 5.99 |
| <i>PbNCED15</i> | XM_009378252.2 | NW_008988325.1 | Scaff12      | 584             | 65.28  | 6.10 |
| <i>PbNCED16</i> | XM_018645641.1 | NW_008989098.1 | Scaff13      | 517             | 58.04  | 5.63 |
| <i>PbNCED17</i> | XM_018646301.1 | NW_008989585.1 | Scaff14      | 569             | 64.34  | 5.63 |
| <i>PbNCED18</i> | XM_018647118.1 | NW_008988075.1 | Scaff1       | 555             | 62.63  | 6.16 |
| <i>PbNCED19</i> | XM_018649309.1 | NW_008988157.1 | Scaff5       | 583             | 65.06  | 5.81 |

**Table S2 Secondary structure of NCED family proteins**

| Gene name       | Alpha helix/% | Beta turn/% | Extended strand/% | Random coil/% | Subcellular localization |
|-----------------|---------------|-------------|-------------------|---------------|--------------------------|
| <i>PbNCED1</i>  | 17.13         | 6.36        | 21.53             | 54.98         | Chloroplast              |
| <i>PbNCED2</i>  | 15.26         | 5.80        | 24.05             | 54.89         | Chloroplast              |
| <i>PbNCED3</i>  | 17.14         | 6.49        | 54.24             | 22.13         | Chloroplast              |
| <i>PbNCED4</i>  | 14.92         | 6.35        | 56.60             | 22.13         | Chloroplast              |
| <i>PbNCED5</i>  | 13.71         | 6.54        | 55.49             | 24.26         | Peroxisome               |
| <i>PbNCED6</i>  | 12.20         | 5.31        | 59.65             | 22.83         | Cytoplasmic              |
| <i>PbNCED7</i>  | 15.31         | 5.82        | 57.07             | 21.80         | Chloroplast              |
| <i>PbNCED8</i>  | 14.64         | 5.99        | 57.24             | 22.13         | Chloroplast              |
| <i>PbNCED9</i>  | 17.94         | 6.75        | 52.22             | 23.09         | Cytoplasmic              |
| <i>PbNCED10</i> | 20.00         | 4.72        | 54.96             | 20.33         | Chloroplast; Cytoplasmic |
| <i>PbNCED11</i> | 14.91         | 5.02        | 58.67             | 21.39         | Chloroplast              |
| <i>PbNCED12</i> | 14.91         | 5.02        | 58.67             | 21.39         | Chloroplast              |
| <i>PbNCED13</i> | 20.00         | 4.72        | 54.96             | 20.33         | Chloroplast; Cytoplasmic |
| <i>PbNCED14</i> | 17.69         | 6.01        | 54.71             | 21.59         | Chloroplast              |
| <i>PbNCED15</i> | 17.64         | 6.16        | 54.11             | 22.09         | Chloroplast              |
| <i>PbNCED16</i> | 13.54         | 6.00        | 56.87             | 23.60         | Mitochondria             |
| <i>PbNCED17</i> | 11.25         | 5.98        | 60.81             | 21.97         | Cytoplasmic              |
| <i>PbNCED18</i> | 20.90         | 6.31        | 48.47             | 24.32         | Peroxisome; Cytoplasmic  |
| <i>PbNCED19</i> | 15.27         | 5.66        | 57.29             | 21.78         | Chloroplast              |

**Table S3 Analysis of duplication time of Ka/Ks values response of the homologous gene pairs for NCED gene family in pear**

| Homologous<br>gene pair | Ka     | Ks     | Ka/Ks  | Duplication time<br>(millions years ago) |
|-------------------------|--------|--------|--------|------------------------------------------|
| PbNCED1 & PbNCED11      | 0.0394 | 0.2550 | 0.1547 | 84.984                                   |
| PbNCED1 & PbNCED12      | 0.0394 | 0.2550 | 0.1547 | 84.984                                   |
| PbNCED5 & PbNCED18      | 0.0337 | 0.1313 | 0.2566 | 43.763                                   |
| PbNCED6 & PbNCED18      | 0.0349 | 0.0942 | 0.3707 | 31.402                                   |
| PbNCED4 & PbNCED19      | —      | —      | —      | —                                        |

**Table S4 Effects of different treatments on concentrations of hormones in sepal and ovary of ‘*Pyrus sinkiangensis* Yu’.**

| Time (d) | Treatment         | GA <sub>3</sub> (ng•g <sup>-1</sup> ) |                | IAA (ng•g <sup>-1</sup> ) |               | ABA (ng•g <sup>-1</sup> ) |              |
|----------|-------------------|---------------------------------------|----------------|---------------------------|---------------|---------------------------|--------------|
|          |                   | Sepal                                 | Ovary          | Sepal                     | Ovary         | Sepal                     | Ovary        |
| 1        | CK                | 535.98±9.94a                          | 313.25±10.61a  | 762.70±9.28a              | 242.13±12.29a | 116.68±3.70a              | 539.29±9.24a |
|          | GA <sub>3</sub>   | 364.83±12.18b                         | 284.44±7.78b   | 565.73±9.99b              | 226.67±10.64a | 107.86±7.88a              | 193.07±6.48b |
|          | PP <sub>333</sub> | 532.35±11.36a                         | 298.37±10.00ab | 534.09±10.32c             | 196.57±6.08b  | 115.70±4.21a              | 175.40±7.07b |
| 5        | CK                | 505.15±11.36c                         | 639.66±11.38a  | 764.90±12.36a             | 260.70±11.45a | 189.14±5.89b              | 616.29±7.89b |
|          | GA <sub>3</sub>   | 698.20±11.67a                         | 574.27±11.47b  | 591.54±13.60c             | 274.40±12.68a | 128.98±4.89c              | 415.75±8.22c |
|          | PP <sub>333</sub> | 592.34±6.91b                          | 619.39±12.02a  | 634.52±12.63b             | 210.25±7.55b  | 311.99±4.17a              | 845.74±7.44a |
| 9        | CK                | 404.82±12.77a                         | 360.43±10.02b  | 977.15±18.79b             | 223.88±7.47b  | 509.78±7.98b              | 230.99±4.98b |
|          | GA <sub>3</sub>   | 302.04±11.84b                         | 407.45±6.99a   | 1127.92±17.94a            | 280.81±11.48a | 312.08±7.47c              | 174.47±6.24c |

|                   |               |               |              |               |              |              |
|-------------------|---------------|---------------|--------------|---------------|--------------|--------------|
| PP <sub>333</sub> | 231.56±11.62c | 239.39±10.64c | 680.53±9.99c | 277.03±12.29a | 927.53±9.38a | 552.69±6.29a |
|-------------------|---------------|---------------|--------------|---------------|--------------|--------------|

Data are mean ± standard error. Significant differences at P < 0.05 are denoted with different letters.

Table S5 Effects of different treatments on the balance between hormones in sepal and ovary of ‘*Pyrus sinkiangensis* Yu’.

| Time(d) | Treatment | GA3/ABA      |              | IAA/ABA      |              |
|---------|-----------|--------------|--------------|--------------|--------------|
|         |           | Sepal        | Ovary        | Sepal        | Ovary        |
| 1       | CK        | 6.546±0.287a | 0.449±0.015c | 4.601±0.231a | 0.581±0.01c  |
|         | GA3       | 5.280±0.479b | 1.174±0.016b | 3.393±0.139b | 1.474±0.009a |
|         | PP333     | 4.626±0.257a | 1.121±0.011a | 4.604±0.069b | 1.706±0.126b |
| 5       | CK        | 4.046±0.062b | 0.423±0.024b | 2.672±0.032b | 1.038±0.005b |
|         | GA3       | 4.589±0.069a | 0.660±0.017a | 5.418±0.115a | 1.381±0.002a |
|         | PP333     | 2.035±0.068c | 0.249±0.007c | 1.899±0.048c | 0.732±0.011c |
| 9       | CK        | 1.917±0.007b | 0.969±0.011b | 0.794±0.013b | 1.560±0.01b  |
|         | GA3       | 3.615±0.029a | 1.609±0.009a | 0.967±0.015a | 2.337±0.044a |
|         | PP333     | 0.734±0.003c | 0.501±0.017c | 0.250±0.01c  | 0.433±0.016c |

Data are mean ± standard error. Significant differences at P < 0.05 are denoted with different letters.

**Table S6 Additional file 1 Primer sequences for quantitative real time PCR**

| Gene            | Forward primer (5'-3') | Reverse primer (5'-3') |
|-----------------|------------------------|------------------------|
| <i>PbNCED1</i>  | CTACAAGACACCGCCACCTT   | CAAGTTCCATTGTTGCGGCA   |
| <i>PbNCED2</i>  | CGGAGAGATGATCACGGGTG   | TTTCGGACAGCACGCTTTTG   |
| <i>PbNCED3</i>  | CCTCGACGGAGCCTACATTC   | ATTGGCCTGTAAAGACCCGG   |
| <i>PbNCED4</i>  | CTACAGCCCCGTGTTTCCAT   | GTCAACTGCGTACCTGGGAA   |
| <i>PbNCED5</i>  | TGGGCAATGGGTCTGTCAAA   | GGCCTTGGACATTTCTCCA    |
| <i>PbNCED6</i>  | CATGCATGACCCTGTACCGA   | AAACAACCTTCGTCCCCCTCC  |
| <i>PbNCED7</i>  | GCTTGGTAGACAGCTCACGT   | GTACTTGAGGTGCGGCTTCT   |
| <i>PbNCED8</i>  | CATGGACCCACCGGATTCAA   | AGCAATACCCGAACACCTGG   |
| <i>PbNCED10</i> | GGTGTCTGGGGAAGTTGAGG   | TCCTGATCCCCAGATGGTGT   |
| <i>PbNCED11</i> | TCAGCCAAGAACGTGACCTC   | GGTCCCCTGTTTCGGTGATT   |
| <i>PbNCED12</i> | TCAGCCAAGAACGTGACCTC   | GGTCCCCTGTTTCGGTGATT   |
| <i>PbNCED13</i> | GGTGTCTGGGGAAGTTGAGG   | TCCTGATCCCCAGATGGTGT   |
| <i>PbNCED18</i> | AGCAATGGTGGATGTCGAGG   | AAGCACTCAGGAAGATGGCC   |
| <i>PbNCED19</i> | GCGAGCTGATACATGGCTCT   | GAGAGGATATCCGGCTTCGC   |
| <i>Actin</i>    | CCATCCAGGCTGTTCTCTC    | GCAAGGTCCAGACGAAGG     |
